# Supplementary material
Source: PubMed Central journal article supplement (PMC5123931)
Supplement: NIHMS812137-supplement-2.pdf [file NIHMS812137-supplement-2.pdf]

**Table S2.** Association of Tertiles of Baseline C-Reactive Protein with Development of ESRD in Patients with Baseline CRP Above the Lower Limit of Detection (>3 mg/L)

| Model<br>(Events/Total) | Hazard Ratio (95% CI) for ESRD |                    |                    | P for trend |
|-------------------------|--------------------------------|--------------------|--------------------|-------------|
|                         | Lowest Tertile                 | Middle Tertile     | Highest Tertile    |             |
| Adjusted<br>(308/1,710) | Ref                            | 0.99 (0.73 - 1.33) | 1.32 (0.98 – 1.77) | P=0.07      |

For the purposes of this exploratory analysis only patients with baseline CRP concentrations above the lower limit of detection were included (>3 mg/L). The multivariable model was adjusted for age, gender, race, estimated GFR, log-transformed urine protein/creatinine ratio, history of acute renal failure, duration of T2DM, HbA1c, retinopathy, insulin use, body mass index, hemoglobin, serum albumin, coronary artery disease, cerebrovascular disease, peripheral arterial disease, heart failure, systolic blood pressure, low-density lipoprotein concentration, statin therapy, ACE inhibitor or ARB therapy, smoking status, ferritin, transferrin saturation, iron therapy and randomized treatment assignment.
